# Supplementary material
Source: PubMed Central journal article supplement (PMC8062286)
Supplement: NIHMS1683456-supplement-Supplemental_Publication_Material.pdf [file NIHMS1683456-supplement-Supplemental_Publication_Material.pdf]

## Supplemental Materials

Non-classical monocytes (CD14dimCD16+) are associated with carotid intima-media thickness progression for men but not women: The Multi-Ethnic Study of Atherosclerosis

Running Title: Monocyte subtypes and carotid IMT: Sex differences

Matthew J Feinstein<sup>1</sup>, Margaret F Doyle<sup>3</sup>, James H Stein<sup>4</sup>, Colleen M Sitlani<sup>2</sup>, Alison E Fohner<sup>2</sup>, Sally A Huber<sup>3</sup>, Alan L Landay<sup>5</sup>, Susan R Heckbert<sup>2</sup>, Kenneth Rice<sup>2</sup>, Richard A Kronmal<sup>2</sup>, Catherine Hedrick<sup>6</sup>, Ani Manichaikul<sup>7</sup>, Coleen McNamara<sup>7</sup>, Stephen Rich<sup>7</sup>, Russell P Tracy<sup>3</sup>, Nels C Olson<sup>3</sup>, Bruce M Psaty<sup>8</sup>, Joseph AC Delaney<sup>9</sup>

<sup>1</sup> Departments of Medicine and Preventive Medicine, Northwestern University, Chicago, IL, USA

<sup>2</sup> University of Washington, Seattle, WA, USA

<sup>3</sup> University of Vermont, Burlington, VT, USA

<sup>4</sup> University of Wisconsin, Madison, WI, USA

<sup>5</sup> Rush University Medical Center, Chicago, IL, USA

<sup>6</sup> La Jolla Institute of Immunology, La Jolla, CA, USA

<sup>7</sup> University of Virginia, Charlottesville, VA, USA

<sup>8</sup> Cardiovascular Health Research Unit, Departments of Medicine, Epidemiology, and Health Services, University of Washington, Seattle, WA; Kaiser Permanente Washington Health Research Institute, Seattle, WA.

<sup>9</sup> University of Manitoba, Winnipeg, Manitoba, Canada

**Supplementary Figure I. Case-cohort sample with immune cell subsets analyzed within MESA.**

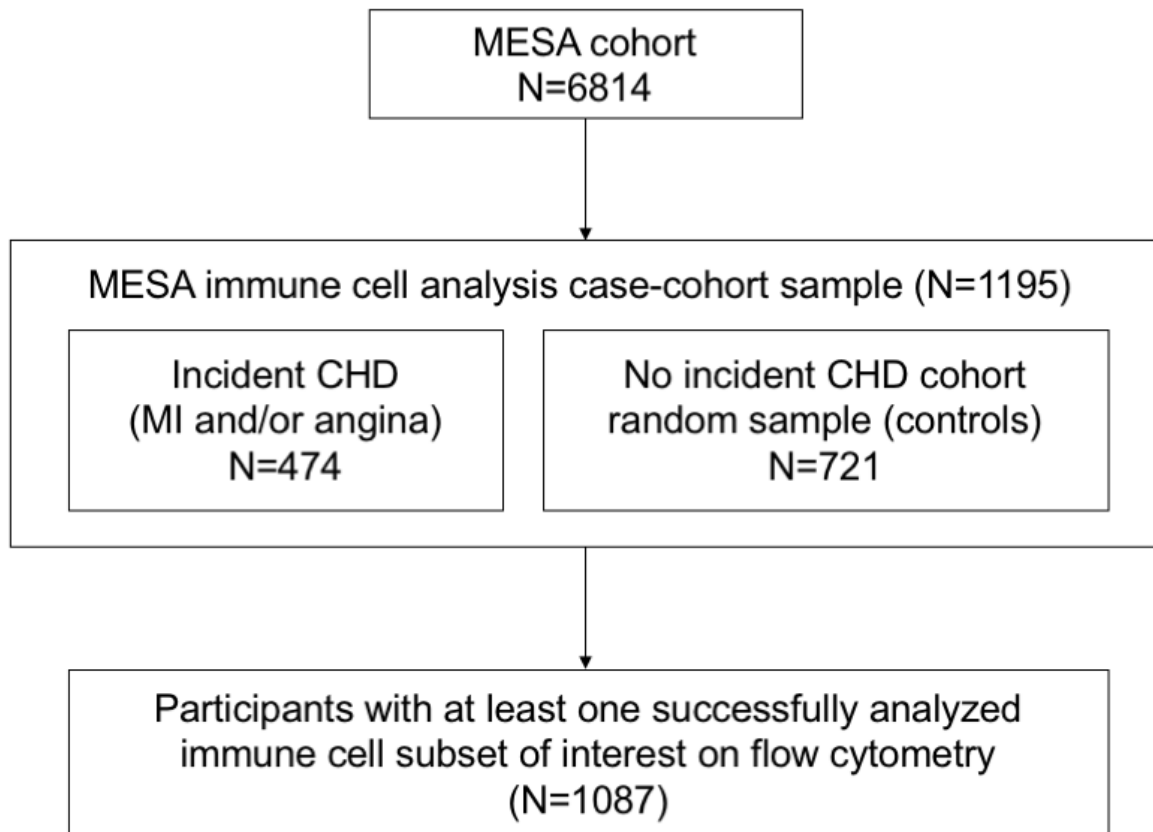

**Supplementary Figure II. Monocyte gating strategy:** PBMCs are gated on live cells, then on monocytes based on size/shape. Using a CD14+ fluorescence minus one (FMO) approach, the negative CD16 gate was set. Finally, the CD16 Ab was added to the test sample to yield the CD14++CD16- gate, the CD14+CD16+ gate and the CD14dimCD16+ gate. These 3 gates are added to yield the CD14 total and the 3 gates are reported as percentage of this total CD14.

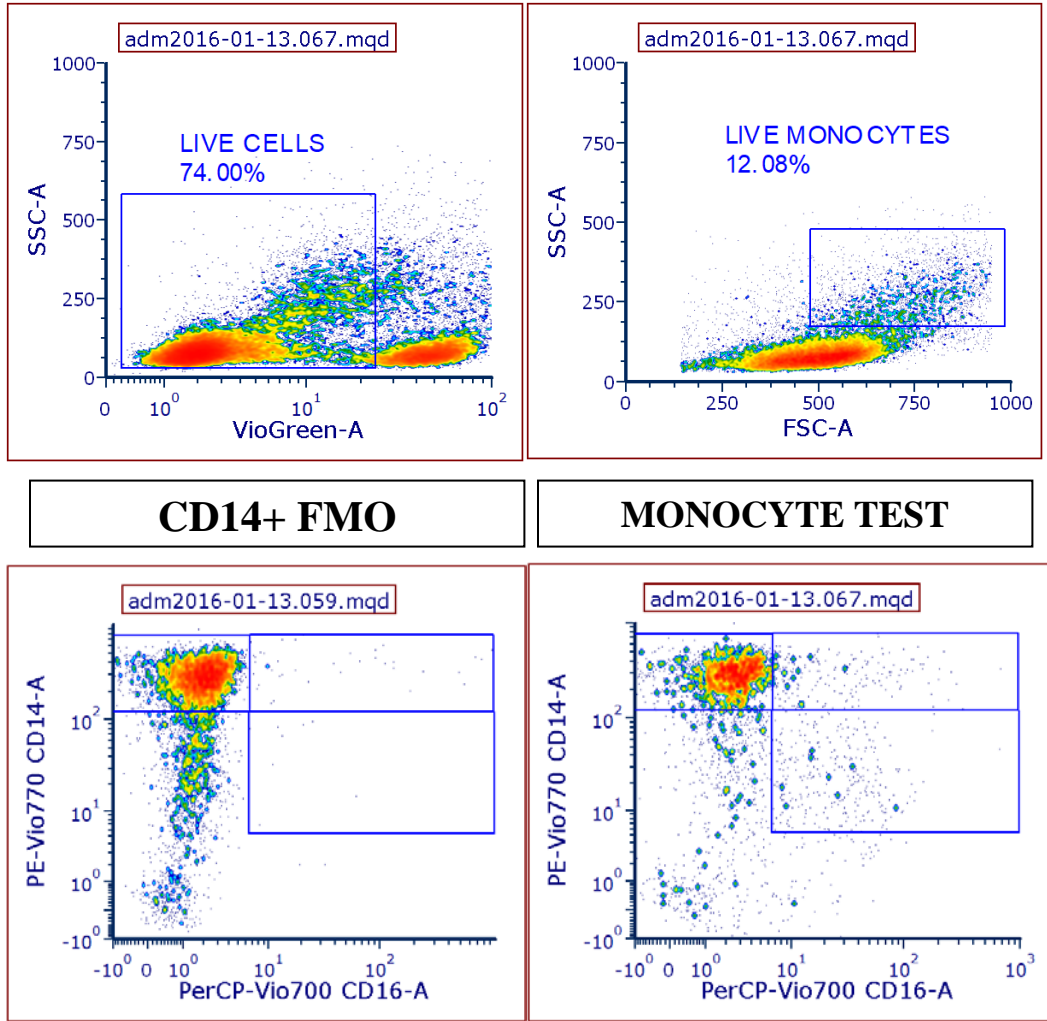

**Supplementary Figure III. Gating strategy for Th1/2/17 and Tc1/2/17:** PBMCs are gated on live cells, then on lymphocytes based on size and shape (top row). Using a modified FMO approach (middle row), a CD4/CD8 tube with appropriate isotypes was used to set negative gates for IFN $\gamma$ , IL4 and IL17. Finally, the test sample allow for the quantitation of IFN $\gamma$ , IL4 and IL17 produced by the cells. CD8 cells were done identically.

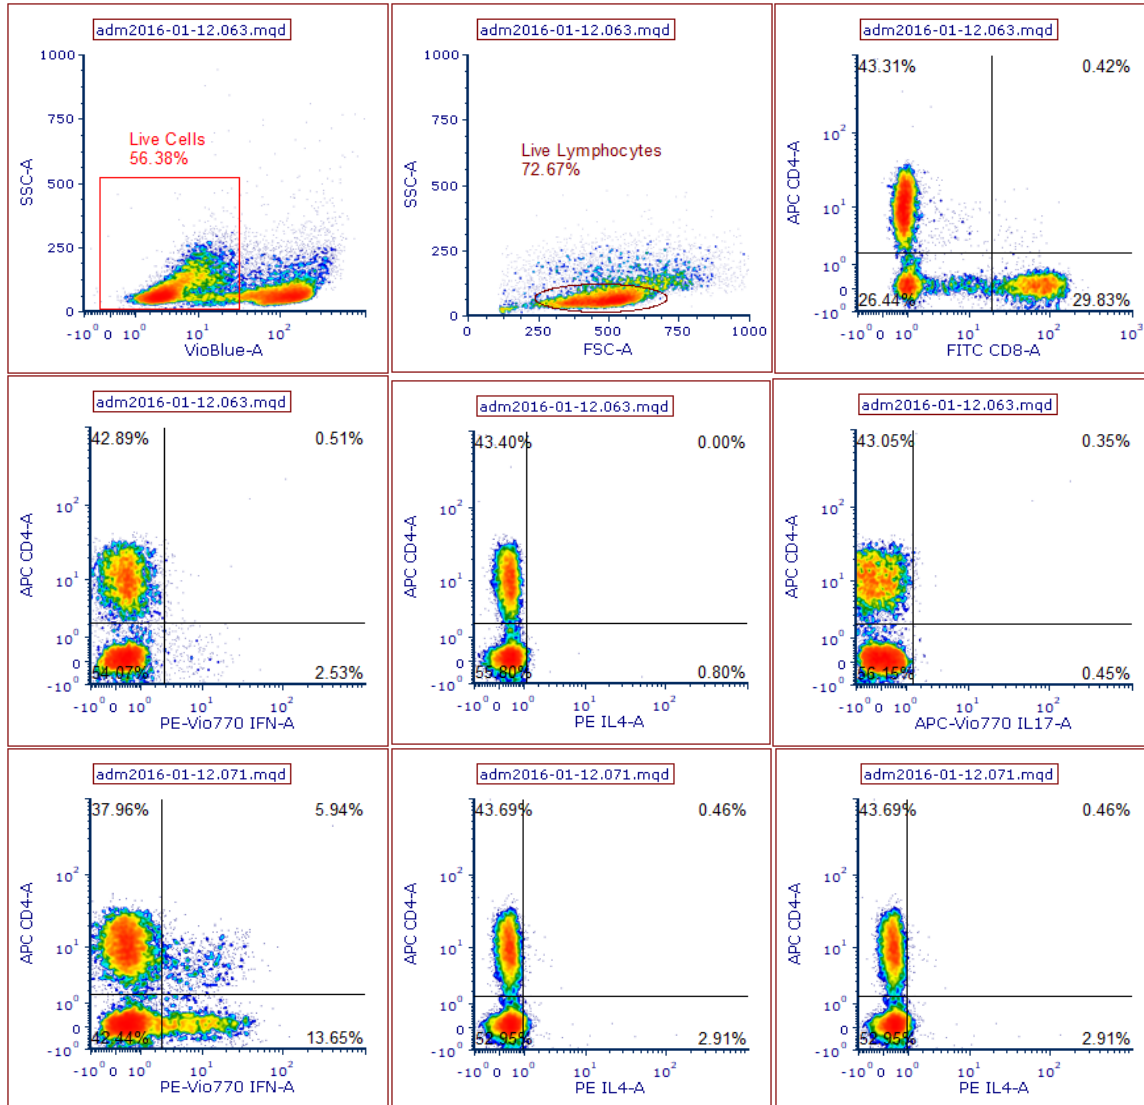

**Supplementary Figure IV. Gating Strategy for CD4/CD8 subsets:** PBMCs are gated on live cells, then on lymphocytes based on size and shape. Isotype controls were used for negative gate setting (Row 2) and the test sample (3<sup>rd</sup> row). The 4<sup>th</sup> row is gated on the CD4+CD45RA+ gate to yield the CD4+ T<sub>EMRA</sub> cells (CD4+CD45RA+CD28-CD57+). The CD8 samples were done identically except CD8 was substituted for CD4.

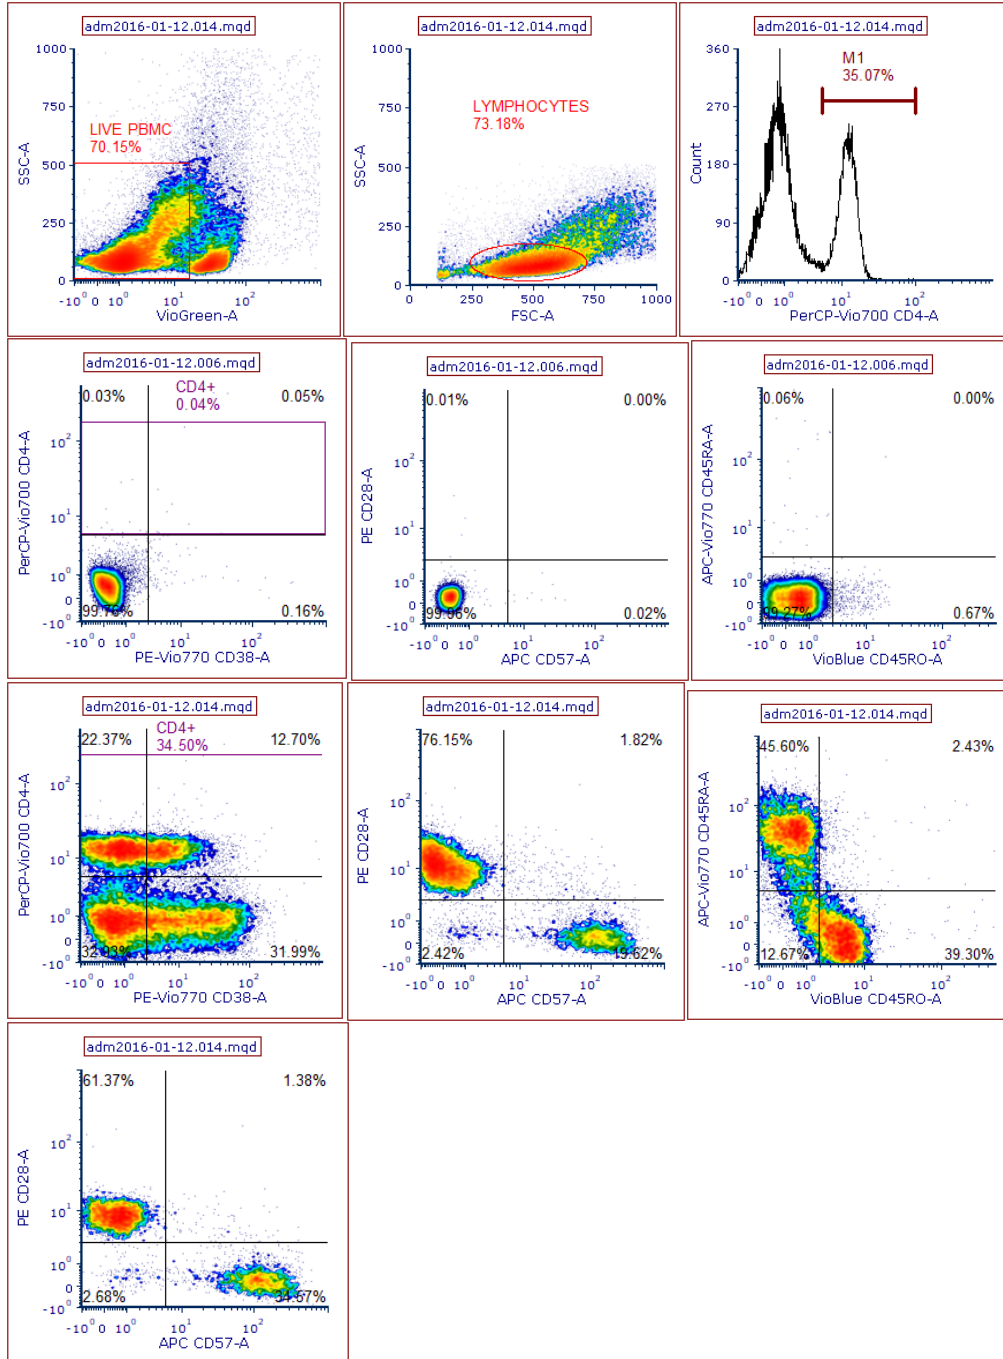

**Supplementary Figure V. Gating strategy for gamma delta T cells, NK cells, B cell subsets:** PBMCs are gated on live cells, then on lymphocytes based on size and shape. Isotype controls were used to set negative gates (2<sup>nd</sup> row, plots 1 & 3, and 3<sup>rd</sup> row plot 2). The lymphocyte gate was used to determine CD3+, CD3-, B cells and gamma delta T cells (expressed as %CD3). NK cells were gated on the CD3- gate. B cells subsets were gated on the B cell gate.

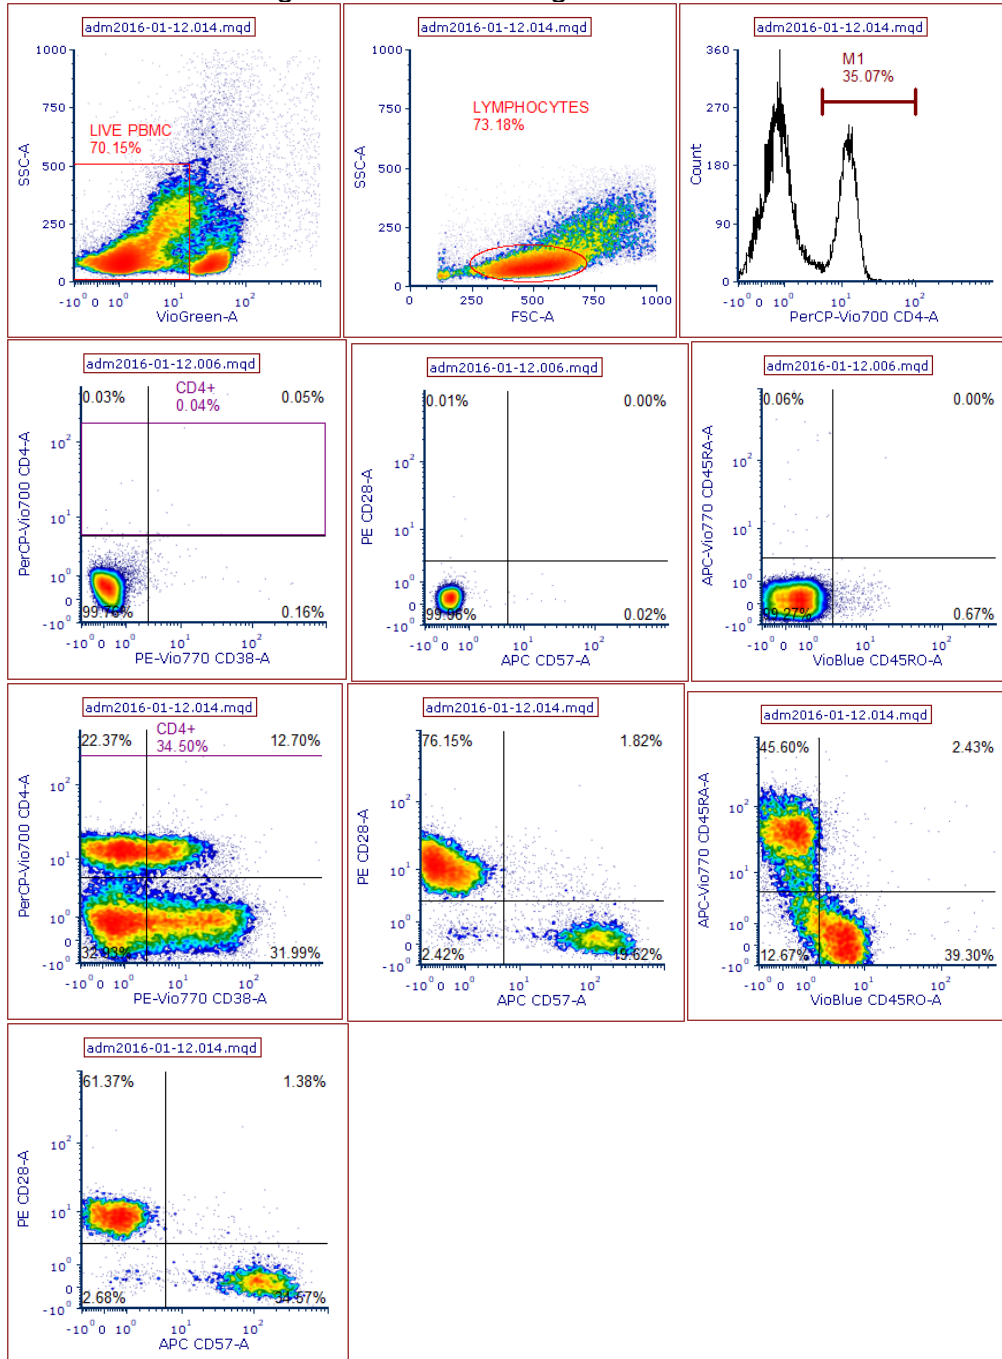

**Supplementary Figure VI. Regulatory T cell gating strategy:** PBMCs were gated on live cells, then gated on lymphocytes, based on size and shape. Isotype controls were used to set negative gates using a CD4+ FMO tube. Histograms (Row 3) were gated on the CD4+CD25+ gate. Regulatory T cells are CD4+CD25+CD127-.

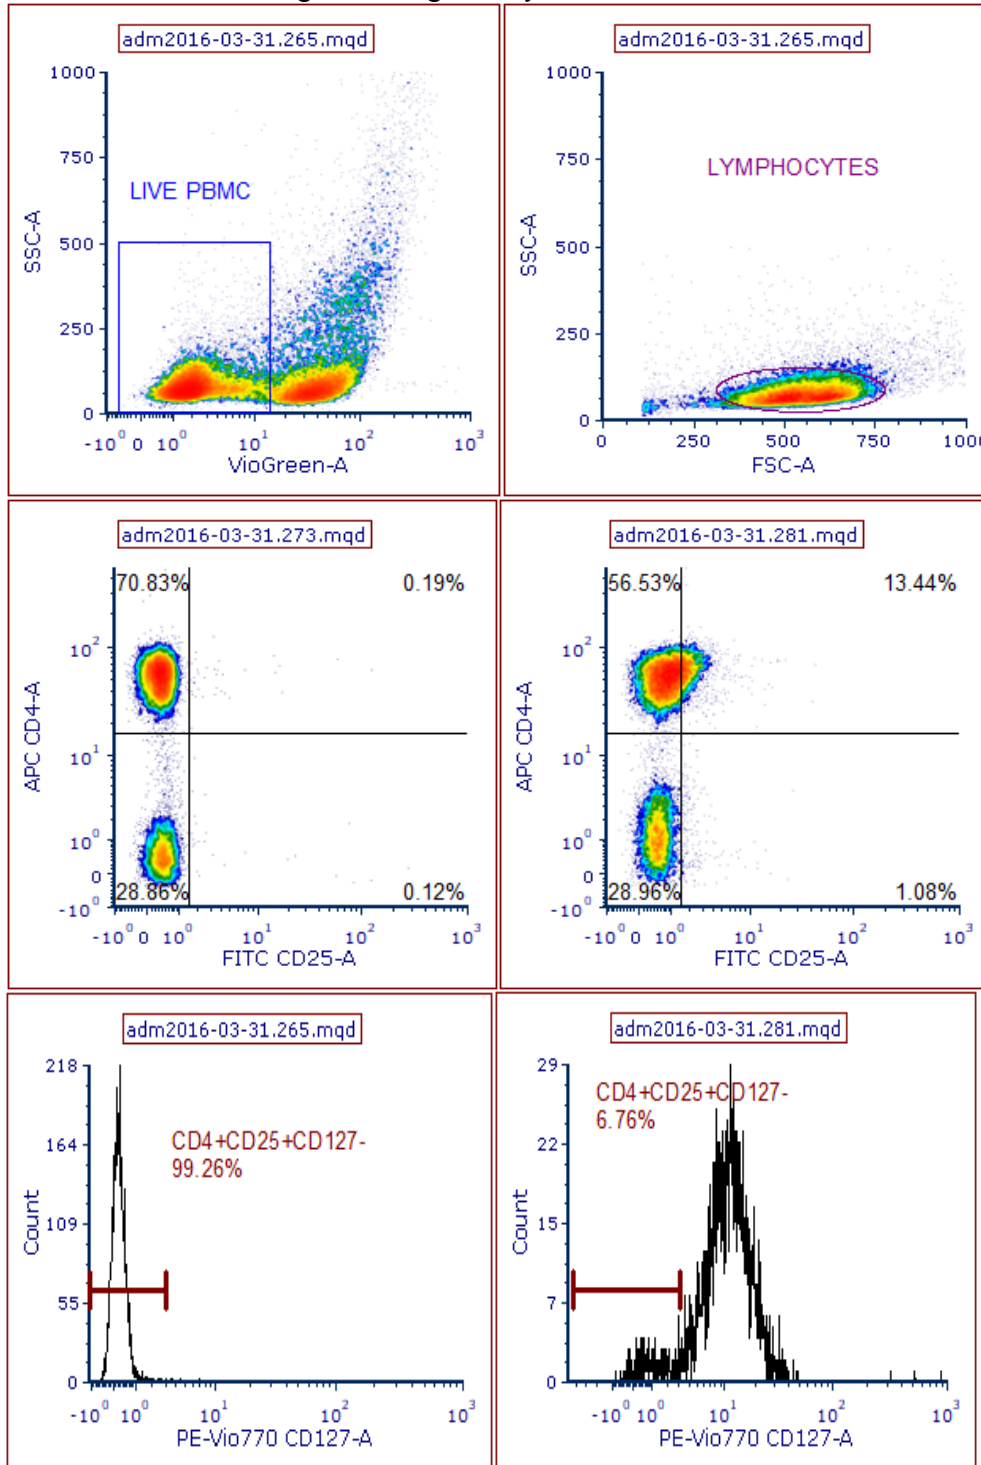

**Supplementary Table I.** Missing baseline data among MESA participants with immune cells measured (N=1195)

| <b>Variable</b>                                            | <b># (%) missing out of 1195</b> |
|------------------------------------------------------------|----------------------------------|
| <b>Age (years)</b>                                         | 0                                |
| <b>Male, n %</b>                                           | 0                                |
| <b>White, n %</b>                                          | 0                                |
| <b>Chinese, n %</b>                                        | 0                                |
| <b>Black, n %</b>                                          | 0                                |
| <b>Hispanic, n %</b>                                       | 0                                |
| <b>SBP (mmHG)</b>                                          | 0                                |
| <b>DBP (mmHG)</b>                                          | 0                                |
| <b>Cholesterol (mg/dL)</b>                                 | 1 (0.08%)                        |
| <b>HDL Cholesterol (mg/dL)</b>                             | 1                                |
| <b>BMI (kg/m<sup>2</sup>)</b>                              | 0                                |
| <b>Diabetes, n %</b>                                       | 0                                |
| <b>Smoker, n %</b>                                         | 0                                |
| <b>Alcohol user</b>                                        | 200 (16.7%)                      |
| <b>Statin user, n %</b>                                    | 1                                |
| <b>CCB user, n %</b>                                       | 1                                |
| <b>Diuretic user, n %</b>                                  | 1                                |
| <b>Beta Blocker user, n %</b>                              | 1                                |
| <b>Vasodilator user, n %</b>                               | 1                                |
| <b>ACE inhibitor user, n %</b>                             | 1                                |
| <b>College education, n %</b>                              | 3 (0.25%)                        |
| <b>Intentional Exercise (met-min)</b>                      | 3 (0.25%)                        |
| <b>IL-6 (pg/mL)</b>                                        | 33 (2.7%)                        |
| <b>CMV (EU/mL)</b>                                         | 6 (0.50%)                        |
| <b>Baseline mean common carotid intima media thickness</b> | 17 (1.4%)                        |



**Supplementary Table II. Main effects for additional subsets for which interactions were explored.**

| Variable     | Estimate (in mm) | 95% CI Lower | 95% CI Upper | p-value       |
|--------------|------------------|--------------|--------------|---------------|
| th17 as %cd4 | 0.001076         | -0.01130     | 0.01346      | 0.8643        |
| CD4+CD28-    | -0.00965         | -0.02447     | 0.005168     | 0.2012        |
| CD14++CD16-  | -0.01216         | -0.02814     | 0.003816     | 0.1353        |
| CD14+CD16++  | 0.01614          | 0.000623     | 0.03166      | <b>0.0415</b> |

**Supplementary Table III. Smoking interactions (with current smoking)**

| Variable     | Estimate (in mm) | 95% CI Lower | 95% CI Upper | p-value |
|--------------|------------------|--------------|--------------|---------|
| th17 as %cd4 | -0.02058         | -0.07875     | 0.03760      | 0.4870  |
| CD4+CD28-    | 0.03292          | -0.01597     | 0.08181      | 0.1863  |
| CD14++CD16-  | -0.03145         | -0.08848     | 0.02557      | 0.2788  |
| CD14+CD16++  | -0.02026         | -0.07916     | 0.03864      | 0.4992  |

**Supplementary Table IV. Male sex interactions**

| Variable     | Estimate (in mm) | 95% CI Lower | 95% CI Upper | p-value       |
|--------------|------------------|--------------|--------------|---------------|
| th17 as %cd4 | 0.002776         | -0.02155     | 0.02710      | 0.8225        |
| CD4+CD28-    | -0.00430         | -0.03486     | 0.02627      | 0.7824        |
| CD14++CD16-  | -0.05310         | -0.08078     | -0.02542     | <b>0.0002</b> |
| CD14+CD16++  | 0.03442          | 0.01154      | 0.05730      | <b>0.0033</b> |

**Supplementary Table V. Sex-stratified analyses of change in mean common carotid artery thickness (micrometers) over 10 years of follow-up <sup>a</sup>**

**V.A. Males**

| Cells scaled per SD | Estimate (in mm) | 95% CI Lower | 95% CI Upper | p-value |
|---------------------|------------------|--------------|--------------|---------|
| CD14++CD16-         | -0.03969         | -0.06310     | -0.01628     | 0.0010  |
| CD14dimCD16++       | 0.03578          | 0.01395      | 0.05761      | 0.0014  |

**V.B. Females**

| Cells scaled per SD | Estimate (in mm) | 95% CI Lower | 95% CI Upper | p-value |
|---------------------|------------------|--------------|--------------|---------|
| CD14++CD16-         | 0.007977         | -0.01028     | 0.02623      | 0.3894  |
| CD14dimCD16++       | 0.004704         | -0.00953     | 0.01894      | 0.5149  |

<sup>a</sup> Linear models adjusted for age, sex, race/ethnicity, current smoking, baseline exercise, body mass index, baseline college education, current diabetes, systolic blood pressure, total cholesterol, HDL cholesterol, and log transformed CMV. Confidence intervals use robust (sandwich) standard error estimates to ensure validity in the presence of weights that are used to account for case-cohort sampling. All estimates are per standard deviation. Complete case data (numbers vary by subset).

**Supplementary Table VI. Baseline and follow-up IMT, stratified by sex and CHD status**

| Sex               | N   | Variable    | Mean      | Standard Deviation | Minimum | Maximum |
|-------------------|-----|-------------|-----------|--------------------|---------|---------|
| Female            | 571 | IMT         | 0.0843180 | 0.1757412          | -1.061  | 0.882   |
|                   |     | E5 IMT (mm) | 0.8487273 | 0.2045589          | 0.468   | 1.621   |
|                   |     | E1 IMT (mm) | 0.7714774 | 0.2249838          | 0.415   | 2.061   |
| Male              | 624 | Δ IMT       | 0.1092593 | 0.1678261          | -0.574  | 1.124   |
|                   |     | E5 IMT (mm) | 0.9219966 | 0.2579272          | 0.429   | 2.382   |
|                   |     | E1 IMT (mm) | 0.8153382 | 0.2367937          | 0.4340  | 2.067   |
| <b>CHD status</b> |     |             |           |                    |         |         |
| No CHD            | 721 | Δ IMT       | 0.1014513 | 0.1385810          | -0.574  | 0.766   |
|                   |     | E5 IMT (mm) | 0.8532099 | 0.2044133          | 0.429   | 2.294   |
|                   |     | E1 IMT (mm) | 0.7535743 | 0.1975299          | 0.434   | 2.067   |
| CHD               | 474 | Δ IMT       | 0.0897647 | 0.2242594          | -1.061  | 1.124   |
|                   |     | E5 IMT (mm) | 0.9558457 | 0.2792489          | 0.504   | 2.382   |
|                   |     | E1 IMT (mm) | 0.8754914 | 0.2711684          | 0.415   | 2.061   |

**Supplementary Table VII. High blood pressure (median split on adjusted BP) interaction**

| Variable     | Estimate (in mm) | 95% CI Lower | 95% CI Upper | p-value |
|--------------|------------------|--------------|--------------|---------|
| th17 as %cd4 | -0.00143         | -0.02958     | 0.02673      | 0.9205  |
| CD4+CD28-    | 0.008201         | -0.01370     | 0.03010      | 0.4622  |
| CD14++CD16-  | 0.002093         | -0.00549     | 0.009678     | 0.5878  |
| CD14+CD16++  | 0.01959          | -0.00429     | 0.04347      | 0.1076  |

**Supplementary Table VIII. Difference in mean common carotid artery thickness (mm) at baseline.<sup>a</sup>**

| Variable             | Estimate (in mm) | 95% CI Lower    | 95% CI Upper    | p-value       |
|----------------------|------------------|-----------------|-----------------|---------------|
| <b>Group 1</b>       |                  |                 |                 |               |
| th1 as %cd4          | 0.01198          | -0.00407        | 0.02804         | 0.1431        |
| <b>th17 as %cd4</b>  | <b>-0.00942</b>  | <b>-0.02365</b> | <b>0.004803</b> | <b>0.1938</b> |
| CD4+CD38+            | -0.00438         | -0.01961        | 0.01086         | 0.5728        |
| CD8+CD38+            | -0.00345         | -0.01874        | 0.01185         | 0.6583        |
| NK %lymphs           | -0.01339         | -0.02691        | 0.000131        | 0.0523        |
| cd3+gd+              | -0.0097          | -0.02211        | 0.002703        | 0.1251        |
| <b>CD14++CD16-</b>   | <b>0.01162</b>   | <b>-0.00577</b> | <b>0.02902</b>  | <b>0.1899</b> |
| th2 as %cd4          | -0.01083         | -0.02805        | 0.006393        | 0.2173        |
| <b>CD14dimCD16++</b> | <b>-0.00467</b>  | <b>-0.02199</b> | <b>0.01264</b>  | <b>0.5963</b> |
| cd4+cd25+            | 0.004075         | -0.01068        | 0.01882         | 0.5877        |
| CD14+CD16+           | 0.000921         | -0.01622        | 0.01807         | 0.916         |
| CD4+CD45RA+          | -0.01345         | -0.02922        | 0.002328        | 0.0947        |
| CD8+CD45RA+          | -0.01252         | -0.02876        | 0.003723        | 0.1306        |
| <b>CD4+CD28-</b>     | <b>-0.00062</b>  | <b>-0.01713</b> | <b>0.0159</b>   | <b>0.9417</b> |
| CD8+CD28-            | -0.02929         | -0.04609        | -0.01248        | 0.0007        |
| CD4+CD45RO+          | 0.01697          | -0.00012        | 0.03406         | 0.0516        |
| CD8+CD45RO+          | 0.005438         | -0.0103         | 0.02118         | 0.4979        |

<sup>a</sup> Linear models adjusted for age, sex, race/ethnicity, current smoking, baseline exercise, body mass index, baseline college education, current diabetes, systolic blood pressure, total cholesterol, HDL cholesterol, baseline antihypertensive use, baseline statin use, and log transformed CMV. Confidence intervals use robust (sandwich) standard error estimates to ensure validity in the presence of weights that are used to account for case-cohort sampling. Pre-specified hypotheses are in red (and highlighted for B&W printers). All estimates are per standard deviation. Complete case data (numbers vary by subset).

**Supplementary Table IX. Major Resources.**

**Antibodies**

| <b>Phenotype Assay</b>                                                       | <b>Target Antigen</b> | <b>Catalog #</b> | <b>Fluorophore</b> | <b>Isotype Control Catalog #</b> |
|------------------------------------------------------------------------------|-----------------------|------------------|--------------------|----------------------------------|
| <b>γδ T and Natural Killer cells</b>                                         | CD3                   | 130-094-363      | VioBlue            | 130-094-671                      |
|                                                                              | γδ TCR                | 130-096-869      | PE                 | 130-092-212                      |
|                                                                              | CD56                  | 130-100-676      | PE-Vio770          | 130-104-616                      |
|                                                                              | CD16                  | 130-100-430      | PerCP-Vio700       | 130-098-595                      |
| <b>CD4<sup>+</sup> and CD8<sup>+</sup> subsets (cell stimulation assays)</b> | CD4                   | 130-092-374      | APC                | 130-091-836                      |
|                                                                              | CD8                   | 130-104-519      | VioBright FITC     | 130-104-512                      |
|                                                                              | IFN-γ                 | 130-096-752      | PE-Vio770          | 130-096-654                      |
|                                                                              | IL-4                  | 130-091-647      | PE                 | 130-092-212                      |
|                                                                              | IL-17A                | 130-096-656      | APC-Vio770         | 130-096-653                      |
| <b>CD4<sup>+</sup> subsets</b>                                               | CD4                   | 130-103-793      | PerCP-Vio700       | 130-097-561                      |
|                                                                              | CD45RA                | 130-096-604      | APC-Vio770         | 130-096-822                      |
|                                                                              | CD45RO                | 130-099-044      | VioBlue            | 130-094-671                      |
|                                                                              | CD28                  | 130-092-921      | PE                 | 130-092-212                      |
|                                                                              | CD38                  | 130-099-151      | PE-Vio770          | 130-096-638                      |
|                                                                              | CD57                  | 130-092-141      | APC                | 130-093-176                      |
|                                                                              | CD27                  | 130-104-845      | VioBright FITC     | 130-104-513                      |
| <b>CD4<sup>+</sup> chemokine receptor assays</b>                             | CD4                   | 130-103-793      | PerCP-Vio700       | 130-097-561                      |
|                                                                              | CD194 (CCR4)          | 130-103-814      | PE-Vio770          | 130-096-654                      |
|                                                                              | CD196 (CCR6)          | 130-100-373      | APC                | 130-093-176                      |
|                                                                              | CD183 (CXCR3)         | 130-106-009      | VioBright FITC     | 130-104-513                      |
|                                                                              | CD195 (CCR5)          | 130-106-223      | PE                 | 130-092-212                      |
| <b>CD8<sup>+</sup> subsets</b>                                               | CD8                   | 130-097-911      | PerCP-Vio700       | 130-097-563                      |
|                                                                              | CD45RA                | 130-096-604      | APC-Vio770         | 130-096-822                      |
|                                                                              | CD45RO                | 130-099-044      | VioBlue            | 130-094-671                      |
|                                                                              | CD28                  | 130-092-921      | PE                 | 130-092-212                      |
|                                                                              | CD38                  | 130-099-151      | PE-Vio770          | 130-096-638                      |
|                                                                              | CD57                  | 130-092-141      | APC                | 130-093-176                      |
|                                                                              | CD27                  | 130-104-845      | VioBright FITC     | 130-104-513                      |
| <b>B Cell subsets</b>                                                        | CD19                  | 130-096-643      | APC-Vio770         | 130-096-653                      |

|                                           |       |             |                   |             |
|-------------------------------------------|-------|-------------|-------------------|-------------|
|                                           | CD5   | 130-096-577 | APC               | 130-092-214 |
|                                           | CD27  | 130-104-845 | VioBright<br>FITC | 130-104-513 |
| <b>Monocyte subsets</b>                   | CD14  | 130-096-628 | PE-Vio770         | 130-096-638 |
|                                           | CD16  | 130-100-430 | PerCP-<br>Vio700  | 130-098-595 |
| <b>CD4<sup>+</sup> T Regulatory cells</b> | CD4   | 130-092-374 | APC               | 130-091-836 |
|                                           | CD25  | 130-104-274 | VioBright<br>FITC | 130-104-575 |
|                                           | CD127 | 130-099-719 | PE-Vio770         | 130-096-638 |
|                                           | CD6   | 130-105-129 | APC-Vio770        | 130-096-653 |

All antibodies were from Miltenyi Biotec (San Diego, CA). All assays used antibody dilutions as recommended by Miltenyi.
